# Supplementary material for: The Ecology of Stress: linking life-history traits with physiological control mechanisms in free-living guanacos
Source: PeerJ. 2016 Nov 2;4:e2640. doi: 10.7717/peerj.2640 (PMC5101617; doi:10.7717/peerj.2640)
Supplement: Data S1 [file peerj-04-2640-s001.xls]

## Sheet: Hoja1
N	Codigo	Sitio	Mes	Hora	Cortisol Ng/gr de MF	Testosterona Ng/gr en MF
1	010727PA	Lomas Espinudas	Enero		26.363	2.871
2	010728PA	Lomas Espinudas	Enero		21.92	3.042
3	010739PA	Pampa Luan	Enero		21.41	1.863/2.524
4	020770PA	Lomas Espinudas	Febrero		14.482	1.412
5	020777PA	antes del Valle del Zaino	Febrero		11.648
6	0207106PA	huella de la penca	Febrero		46.692
7	0307118PA	Peralito	marzo		9.451	1.373
8	0307121PA	Cº loro	marzo		13.472	1.707
9	0307124PA	Cº loro	marzo		10.746	1.233
10	0607131PA		junio	15:30	14.468	1.587
11	907174	barreal de la penca	septiembre	10:30	24.9	3.377
12	1007227	huella de la mina	octubre	17:40	17.071	3.177/1.058
13	1007237	rincon amarillo	octubre	13:45	22.5
14	108329	Cerro san pozo	Enero	13:10	16.785	3.063
15	108331	Cº loro	Enero	14:23	16.674	5.86/5.946
16	108337	Cºla penca	Enero	16:43	9.632	1.678
17	108350	Cº loro	Enero	17:00	19.236	2.049/1.603
18	108351	Cº loro	Enero	17:00	17.645	4.441
19	408481	V.zaino	Abril	16:14	8.772	1.496
20	408483	V.zaino	Abril	17:30	7.587	1.679
21	408487	huella de la penca	Abril	15:45	9.755	2.515
22	608496	V.zaino	junio	14:10	8.88	1.498
23	608509	V.zaino	junio	14:15	7.443
24	608510	V.zaino	junio	14:20	9.967	2.772
25	109799	Cºloro	Enero	12:00	25.277	3.602
26	109841	cºloro	Enero	11:00	19.567
27	109842	Cºloro	Enero	11:01	20.257	5.565
28	109908	cºloro	Febrero	16:02	18.518
29	109911	cºloro	Febrero	10:31	19.768
30	109914	entre loro y san pozo	Febrero	11:02	21.19	3.719
31	109929	loro y penca	Febrero	15:20	27.513
32	109939	Penca-Huella del medio	Febrero	17:20	25.182	3.706
33	110005	V.zaino	Febrero	8:46	25.609	1.662
34	110006	V.zaino	Febrero	8:47	43.023	4.072
35	110024	V.zaino	Febrero	11:30	34.739
1	010702PA	C. Negro	Enero		18.751	2.982
2	010704PA	C. Negro	Enero		18.058	4.166
3	010705PA	C. Negro	Enero		27.8	3.44
4	010706PA	C. Negro	Enero		24.151	4.02
5	010707PA	C. Negro	Enero		20.27	2.881
6	010708PA	C. Negro	Enero		17.364	3.223
7	010709PA	C. Negro	Enero		13.317	2.999
8	010710PA	C. Negro	Enero		20.984	3.548
9	010711PA	C. Negro	Enero		16.907	2.838
10	010712PA	C. Negro	Enero		14.177	3.797
11	010713PA	C. Negro	Enero		20.815	4.396
12	010725PA	Lomas Espinudas	Enero		19.017
13	020766PA	Valle del Zaino	Febrero		17.485	1.957
14	020767PA	Valle del Zaino	Febrero		14.509	1.56
15	020769PA	Lomas Espinudas	Febrero		9.733	2.181
16	0207104PA	huella de la penca	Febrero		12.837	1.001
17	907204	Valle del Zaino	Septiembre	15:00	7.873	2.125
18	907205	Valle del Zaino	Septiembre	15:30	11.679
19	907206	Loma espinuda	Septiembre	17:00	10.845	1.96
20	907207	Loma espinuda	Septiembre	17:20	10.156	1.774
21	907217	Valle del Zaino	Septiembre	17:00	14.885	1.976
22	907218	Lomas Espinudas	Septiembre	12:00	11.274	3.121
23	907219	Lomas Espinudas	Septiembre	13:00	23.248	4.396
24	907224	Valle del Zaino	Septiembre	14:45	11.886	2.216
25	907225	Valle del Zaino	Septiembre	15:25	21.851	2.304
26	1007234		Octubre	12:45	13.258	4.284
27	1007235		Octubre	13:14	14.776	3.151
28	1107254		Noviembre	18:30	23.027	5.058
29	1107266	Lomas Espinudas	Noviembre	15:30	24.641	4.232
30	1107267	Pampa los pajaritos	Noviembre	16:45	19.703	4.001
31	1107268	Valle del Zaino	Noviembre	18:20	27.586	2.359
32	1107274	Guayquerias coloradas	Noviembre	19:34	18.916	3.278
33	108282	Valle del Zaino	Enero	11:30	10.678	1.915
34	108287	Valle del Zaino	Enero	18:30	9.8385	2.552
35	108288	Valle del Zaino	Enero	18:31	17.916	2.345
36	108289	Valle del Zaino	Enero	18:50	18.5	2.536
37	108290	Valle del Zaino	Enero	19:00	8.068
38	108291	Valle del Zaino	Enero	19:30	11.717	1.856
39	108292	Valle del Zaino	Enero	20:00	14.752	1.545
40	108293	Valle del Zaino	Enero	20:20	10.553	2.544
41	108330	Cº loro	Enero	14:22	15.944	3.72
42	108332	Cº loro	Enero	14:24	21.284
43	108333	Cº loro	Enero	15:30	9.935	3.62
44	108346	Cº loro	Enero	13:30	23.335	3.364
45	108347	Cº loro	Enero	14:00	11.6	2.965
46	108348	Cº loro	Enero	15:00	24.415	3.854
47	108349	Cº loro	Enero	16:10	7.321	1.568
48	408451	Guayquerias coloradas	Abril	9:20	12.834	2.575
49	408460	V.zaino	Abril	11:30	11.087	2.311
50	408479	V.zaino	Abril	15:20	14.959	2.587
51	408480	V.zaino	Abril	15:20	15.667	1.888
52	408482	V.zaino	Abril	16:14	12.661
53	408486	Lomas Espinudas	Abril	11:02	8.761	1.686
54	408488	huella de la penca	Abril	16:15	20.64	2.775
55	608495	Cº loro	Abril	11:50	11.621	2.017
56	608505	V.zaino	Junio	13:25	9.971	2.667
57	608506	V.zaino	Junio	13:30	18.971	3.272
58	608507	V.zaino	Junio	13:35	12.639
59	608508	V.zaino	Junio	13:40	13.038	1.07
60	608511	V.zaino	Junio	15:00	5.182	2.142
61	608512	V.zaino	Junio	15:10	12.087	2.432
62	608513	V.zaino	Junio	15:20	15.667	1.429
63	608514	V.zaino	Junio	15:25	5.215	1.276
64	608515	V.zaino	Junio	14:00	22.292	1.255
65	608516	V.zaino	Junio	14:10	9.004	2.402
66	808546	Pampa los pajaritos	Agosto	7:00	14.121	2.274
67	808547	Pampa los pajaritos	Agosto	9:00	36.458	4.376
68	808548	Pampa los pajaritos	Agosto	7:00	9.692	1.763
69	808549	Pampa los pajaritos	Agosto	9:30	16.937	2.387
70	808551	Lomas Espinudas	Agosto	11:14	12.714	1.94
71	808552	Lomas Espinudas	Agosto	10:30	11.279	1.684
72	808553	Lomas Espinudas	Agosto	11:30	32.089	2.355
73	808554	Lomas Espinudas	Agosto	11:30	9.073
74	808555	Lomas Espinudas	Agosto	12:00	8.281	1.538
75	808556	Lomas Espinudas	Agosto	12:01	8.288	1.365
76	808557	Lomas Espinudas	Agosto	12:02	15.398	1.661
77	808558	Lomas Espinudas	Agosto	12:00	6.04	0.918
78	808559	Lomas Espinudas	Agosto	13:30	15.697	3.097
79	808560	Lomas Espinudas	Agosto	13:30	7.691	1.553
80	808561	frente al cerro chacaico	Agosto	15:00	12.499	2.221
81	808562	frente al cerro chacaico	Agosto	15:01	13.858	3.031
82	808585	Lomas Espinudas	Agosto	8:30	38.321	3.319
83	1008642	Cº loro	Octubre	18:15	17.633	2.825
84	1008673	V.zaino	Octubre	11:40	15.559	3.853
85	1008676	V.zaino	Octubre	12:14	26.254	3.154
86	1008677	V.zaino	Octubre	13:00	13.501	3.119
87	1008678	Guadalosos	Octubre	14:00	11.752	2.827
88	1108749	Penca	noviembre	12:15	12.252	4.546
89	1108766	huaquerias coloradas	noviembre	9:30	7.243	1.163
90	1108772	V.zaino	noviembre	11:30	9.947	4.594
91	1108773	Guadalosos	noviembre	12:30	9.631	3.319
92	1108774	Guadalosos	noviembre	12:30	9.789
93	1108775	pampa de los pajaritos	noviembre	15:30	13.526	1.434
94	1108786	huella del medio	noviembre	9:52	14.69	4.782
95	109830	cºloro	enero	12:01	32.872	4.962
96	109831	cºloro	enero	13:40	14.55	1.484
97	109832	cºloro	enero	13:41	28.659
98	109839	huella de la penca	enero	17:20	27.493	5.183
99	109840	huella de la penca	enero	17:50	51.986	5.868
100	109855	huella de la penca	enero	14:08	20.285	4.184
101	109856	huella de la penca	enero	14:09	24.768	3.848
102	109857	huaquerias coloradas	enero	10:00	24.095	2.425
103	109891	V.zaino	enero	13:25	23.038	5.698
104	109892	Lomas Espinudas	enero	17:35	19.753	4.155
105	109894	huaquerias coloradas	enero	9:40	21.273
106	109905	cºnegrito	febrero	15:20	74.084
107	109909	cºloro	febrero	16:03	39.492	2.646
108	109930	Penca-Huella del medio	febrero	16:00	42.912	4.121
109	109937	Penca-Huella del medio	febrero	16:36	76.179	4.448
110	109938	Penca-Huella del medio	febrero	16:37	18.059	3.989
111	109946	loro	febrero	11:17	41.196
112	109947	loro	febrero	11:18	45.73	5.256
113	109963	loro	febrero	12:40	17.261	4.493
114	109965	loro	febrero	13:00	34.919
115	109991	penca-loro	febrero	16:50	43.864
	907211	Zaino	Septiembre	14:00	32.938
	1007236	rincon amarillo	octubre	13:22	26.003
1	0207113PA	Cº loro	Febrero		23.203	1.856
2	020772PA	antes del Valle del Zaino	Febrero		31.046	3.954
3	0607125PA	Guayquerias coloradas	Junio	10:00	10.014
4	0607126PA	Guayquerias coloradas	Junio	10:01	6.556
5	0607134PA	ruta 183-Antes de la Loma Atravesada	Junio	15:30	11.189
6	0607135PA	ruta 183-Antes de la Loma Atravesada	Junio	15:30	19.774	1.076
7	0607139PA	Sam pozo	Junio	17:00	22.576
8	807160	Loma atravesada	Agosto	11:12	3.168
9	807161	Loma atravesada	Agosto	11:13	2.122
10	807162	Loma atravesada	Agosto	11:14	2.617
11	807163	Loma atravesada	Agosto	11:15	5.635	0.828
12	807166	Penca-Huella del medio	Agosto	14:15	7.323
13	807167	Penca-Huella del medio	Agosto	14:15	5.536
14	907180		Septiembre	14:14	21.035	0.96
15	907181	loro NE	Septiembre	14:14	13.549
16	907182	loro NE	Septiembre	14:14	13.135
17	907187	loro NO	Septiembre	17:10	15.09
18	907188	loro NO	Septiembre	17:10	7.972
19	907189	loro NO	Septiembre	17:11	14.203	1.285
20	907190	loro NO	Septiembre	17:12	19.14
21	907191	loro NO	Septiembre	17:13	10.452
22	907192	loro NO	Septiembre	17:14	10.617
23	907193	rincon amarillo	Septiembre	18:03	15.339
24	907194	rincon amarillo	Septiembre	18:04	20.206	3.474
25	907195	rincon amarillo	Septiembre	18:05	14.283
26	907196	rincon amarillo	Septiembre	18:06	22.568
27	907197	rincon amarillo	Septiembre	18:07	21.873	1.321
28	907198	rincon amarillo	Septiembre	18:08	18.815	1.723
29	907199	rincon amarillo	Septiembre	18:09	35.323	0.954
30	907200	rincon amarillo	Septiembre	18:10	28.487	2.782
31	907201	Huella hacia el zaino	Septiembre	13:34	20.467	0.869
32	907202	Huella hacia el zaino	Septiembre	13:34	31.577	1.307
33	907208	Pampa los pajaritos	Septiembre	17:45	17.103
34	1107275		Noviembre	17:00	30.445	2.881
35	1107279		Noviembre	17:00	35.538	2.633
37	408485	Pampa los pajaritos	Abril	11:01	7.948
38	408494	Cº loro	Abril	11:00	23.248	0.988
39	808521	rincon amarillo	Agosto	14:00	22.234
40	808522	rincon amarillo	Agosto	14:01	24.88
41	808523	rincon amarillo	Agosto	14:20	21.166
42	808532	rincon amarillo	Agosto	13:00	69.541
43	808550	Lomas Espinudas	Agosto	11:00	17.938	1.783/1.637
44	808571	camino a la aguita, antes del zanjon	Agosto	16:40	13.825
45	808572	camino a la aguita, antes del zanjon	Agosto	16:41	34.266	3.262
46	808573	camino a la aguita, antes del zanjon	Agosto	16:42	27.012
47	808574	camino a la aguita, antes del zanjon	Agosto	16:43
48	808575	camino a la aguita, antes del zanjon	Agosto	16:44	29.68
49	808576	camino a la aguita, antes del zanjon	Agosto	16:45	22.73
50	808577	camino a la aguita, antes del zanjon	Agosto	16:46	26.441
51	808578	camino a la aguita, antes del zanjon	Agosto	16:47	29.658
52	808586	huaquerias coloradas	Agosto	13:00	25.862
53	808587	huaquerias coloradas	Agosto	13:01
54	808588	huaquerias coloradas	Agosto	13:02	76.747	5.021
55	1008668	cerro ypf	Octubre	19:00	11.511
56	109787	frente al cºypf-	Enero	8:45	35.393
57	109788	frente al cºypf-	Enero	8:46	31.221
58	109789	frente al cºypf-	Enero	8:47	41.839	3.367
59	109790	frente al cºypf-	Enero	8:48	19.026
60	109791	frente al cºypf-	Enero	8:49	60.326	2.469
61	109792	rincon amarillo	Enero	10:00	20.23
62	109793	rincon amarillo	Enero	10:01	57.878	3.037
63	109794	rincon amarillo	Enero	10:02	23.577
64	109795	rincon amarillo	Enero	10:03	14.89
65	109796	rincon amarillo	Enero	10:04	22.958
66	109821	Ruta 183 frente al Cº ypf	Enero	8:00	31.07
67	109822	Ruta 183 frente al Cº ypf	Enero	8:01	30.599
68	109823	Ruta 183 frente al Cº ypf	Enero	8:02	29.655
69	109824	rincon amarillo	Enero	9:10	34.633
70	109898	cºnegrito	Febrero	10:30	37.092
71	109899	cºnegrito	Febrero	10:31	25.814
72	109900	cºnegrito	Febrero	12:00	44.007	3.195
73	109901	cºnegrito	Febrero	12:01	42.207	4.521
74	109902	cºnegrito	Febrero	12:02	19.273
75	109903	cºnegrito	Febrero	12:03
76	109904	cºnegrito	Febrero	12:04	36.564
77	109910	cºloro	Febrero	10:30	46.33
78	109922	loro y penca	Febrero	15:00	33.287
79	109923	loro y penca	Febrero	15:01	42.738	5.841
80	109924	loro y penca	Febrero	15:02	55.175
81	109925	loro y penca	Febrero	15:03	24.011
82	109926	loro y penca	Febrero	15:04	62.079	5.127
83	109927	loro y penca	Febrero	15:05	34.303	3.666
84	109928	loro y penca	Febrero	15:06	38.024
85	109940	Penca-Huella del medio	Febrero	17:50	27.293
86	109941	Penca-Huella del medio	Febrero	17:51	36.897
87	110061	pampa de los pajaritos	Febrero	16:00	21.662
88	110062	pampa de los pajaritos	Febrero	16:01	37.168
89	110063	pampa de los pajaritos	Febrero	16:02	34.049	3.887
90	110064	pampa de los pajaritos	Febrero	16:03
91	110065	pampa de los pajaritos	Febrero	16:04	26.775
92	110066	pampa de los pajaritos	Febrero	16:05	33.081	3.538
93	110067	pampa de los pajaritos	Febrero	16:06	20.738
94	110068	pampa de los pajaritos	Febrero	16:07	35.745	6.136
95	110069	pampa de los pajaritos	Febrero	16:08	44.308	7.149
96	110070	pampa de los pajaritos	Febrero	16:09	34.982
97	110071	pampa de los pajaritos	Febrero	16:10	39.048	4.766
98	110072	pampa de los pajaritos	Febrero	16:11	64.066	4.866
99	110073	pampa de los pajaritos	Febrero	16:12	30.108	4.538
100	110074	pampa de los pajaritos	Febrero	16:13	23.673	4.875
101	110075	pampa de los pajaritos	Febrero	16:14	33.674	6.797
102	110076	pampa de los pajaritos	Febrero	16:15	55.065
103	110077	pampa de los pajaritos	Febrero	16:16	33.391
104	110078	pampa de los pajaritos	Febrero	16:17	20.721	8.027
105	110079	pampa de los pajaritos	Febrero	16:18	61.778	5.156
106	110080	pampa de los pajaritos	Febrero	17:00	24.625

## Sheet: Hoja2
Hembras Gr-Fam	1	010716PA	Lomas Espinudas	2007		Enero		3.724	29.489		30	categoria 2	b
Hembras Gr-Fam	2	010717PA	Lomas Espinudas	2007		Enero		5.011			30	categoria 2	b
Hembras Gr-Fam	3	010719PA	Lomas Espinudas	2007		Enero		7.025	37.135		8	cate 1	b
Hembras Gr-Fam	4	010721PA	Lomas Espinudas	2007		Enero		3.7445	22.715		30	categoria 2	b
Hembras Gr-Fam	5	010722PA	Lomas Espinudas	2007		Enero		6.22	32.463		8	cate 1	b
Hembras Gr-Fam	6	010724PA	Lomas Espinudas	2007		Enero		9.156	43.067		15	cate 1	b
Hembras Gr-Fam	7	010734PA	Lomas Espinudas	2007		Enero		7.123	26.324		16	cate 1	b
Hembras Gr-Fam	8	010735PA	Pampa Luan	2007		Enero		4.4	26.964		3	cate 1	b
Hembras Gr-Fam	9	010738PA	Pampa Luan	2007		Enero		2.3505	28.204		7	cate 1	b
Hembras Gr-Fam	10	010740PA	Pampa Luan	2007		Enero		4.375			7	cate 1	b
Hembras Gr-Fam	11	010741PA	Pampa Luan	2007		Enero		3.8195	28.85		7	cate 1	b
Hembras Gr-Fam	12	010742PA	Pampa Luan	2007		Enero		3.3915	25.934		7	cate 1	b
Hembras Gr-Fam	13	010746PA	Valle del Zaino	2007		Enero		6.4685	35.657		42	categoria 2	b
Hembras Gr-Fam	14	010747PA	Valle del Zaino	2007		Enero		5.7435	29.155		42	categoria 2	b
Hembras Gr-Fam	15	010748PA	Valle del Zaino	2007		Enero		4.497			42	categoria 2	b
Hembras Gr-Fam	16	010751PA	Valle del Zaino	2007		Enero		4.199	29.577		42	categoria 2	b
Hembras Gr-Fam	17	010753PA	Valle del Zaino	2007		Enero		6.2405			42		b
Hembras Gr-Fam	18	020761PA	Valle del Zaino	2007		Febrero		14.572			5		b
Hembras Gr-Fam	19	020763PA	Valle del Zaino	2007		Febrero		14.572			5	cate 1	b
Hembras Gr-Fam	20	020778PA	antes del Valle del Zaino	2007		Febrero		6.325	51.25		94	cate 4	b
Hembras Gr-Fam	21	020779PA	antes del Valle del Zaino	2007		Febrero		5.4125	34.473		94	cate 4	b
Hembras Gr-Fam	22	020780PA	antes del Valle del Zaino	2007		Febrero		4.45	25.415		94		b
Hembras Gr-Fam	23	020781PA	antes del Valle del Zaino	2007		Febrero		4.3025	30.799		94	cate 4	b
Hembras Gr-Fam	24	020783PA	antes del Valle del Zaino	2007		Febrero		2.373	20.09		94	cate 4	b
Hembras Gr-Fam	25	020786PA	antes del Valle del Zaino	2007		Febrero		4.52	51.89	30.516	94	cate 4	b
Hembras Gr-Fam	26	020787PA	antes del Valle del Zaino	2007		Febrero		6.18	35.132		94	cate 4	b
Hembras Gr-Fam	27	1007230	rincon amarillo	2007		octubre		1.958	23.855		30	categoria 2	a
Hembras Gr-Fam	28	1007231	rincon amarillo	2007		octubre		24.552			30		a
